# Supplementary material for: Stromal alterations in patients with monoclonal gammopathy of undetermined significance, smoldering myeloma, and multiple myeloma
Source: PubMed Central journal article supplement — Blood Adv. 2024 Jan 22;8(10):2575–88. doi: 10.1182/bloodadvances.2023011632 (PMC11145751; doi:10.1182/bloodadvances.2023011632), 2024-01-22

### **Suppl. Figure 1**

Overview graph table of overlapping differentially expressed genes (all regulated genes, FDR q-value:  $\leq 0.05$ ) between MGUS and SMM MSC (451), between MGUS and MM (209) and SMM and MM (253).

### **Suppl. Figure 2. Gene set enrichment analysis (GSEA) confirmed contributed cell processes in MGUS, SMM and MM MSC**

Gene set enrichment analysis of a pairwise comparison between healthy and each of the different patient group (MGUS, SMM or MM) ~~Gene set enrichment analysis~~ confirmed a significant overlap of deregulated genes with those involved ~~strong enrichment~~ for cell processes such as hematopoiesis, cell status or osteogenesis in MGUS, SMM and MM MSC. For all plots, the normalized enrichment score (NES), p-values and false discovery rate (FDR q-value) are given.

### **Suppl. Figure 3. Gene set enrichment analysis (GSEA) of MGUS, SMM and MM MSC for the gene sets ribosomes, mitochondrial gene expression and apoptosis**

(A) Waterfall plots from GSEA for the signatures ribosomes (GO\_RIBOSOME) and mitochondrial gene expression (GO\_MITOCHONDRIAL GENE EXPRESSION) for MGUS, SMM and MM MSC contrasted to healthy (HC) are given. For all plots, the normalized enrichment score (NES), p-values and false discovery rate (FDR q-value) are given.

(B) Waterfall plots from GSEA depicts enrichment signature for intrinsic- and extrinsic apoptotic signaling pathway for MGUS, SMM and MM MSC contrasted to healthy

(HC) are given. For all plots, the normalized enrichment score (NES), p-values and false discovery rate (FDR q-value) are given.

### **Suppl. Table 1**

PDF table of unique differentially expressed genes in MGUS MSC (583, FDR q-value  $\leq 0.05$ ) within the comparison of all three MSC groups.

### **Suppl. Table 2**

PDF table of unique differentially expressed genes in SMM MSC (513, FDR q-value  $\leq 0.05$ ) within the comparison of all three MSC groups.

### **Suppl. Table 3**

PDF table of unique differentially expressed genes in MM MSC (3938, FDR q-value  $p \leq 0.05$ ) within the comparison of all three MSC groups.

# Supplemental Figures 1-3

# Suppl. Figure 1

### MGUS vs. SMM all regulated

|             |            |            |            |           |           |            |            |            |            |             |            |            |            |            |             |            |            |
|-------------|------------|------------|------------|-----------|-----------|------------|------------|------------|------------|-------------|------------|------------|------------|------------|-------------|------------|------------|
| HOXB7       | HOXB6      | UQCGRFS1P1 | RMRP       | SOC52     | HTRA3     | DSCC1      | SEMA3D     | FSCN1      | DHCR7      | PIP5K1L     | FBR5       | HSP90B3P   | C12orf45   | AC117409.1 | SLC7A14     | AKNA       | FTH1       |
| RPS3AP5     | MOCOS      | TBX15      | RPL4P5     | PIASA     | LINC02328 | GPM68      | FRA51      | NUDT11     | SETD1A     | TRHDE       | C15orf40   | WRB        | NLRP1      | AOC3       | MTH1        | PTMS       | MT-TC      |
| EEF1A1P5    | RPS27A     | RYL4       | ELN        | KDEL1R    | LRFN4     | NDFU11     | TMEM158    | GYPE       | PMMP9      | PR5D        | MARCH4     | PTGER4     | PLH1       | IL10RA     | THAP1       | NUDCD2     | ZNF571-AS1 |
| HOXB4       | AGPAT1     | ITGA5      | ALDH3A2    | RPL9      | MBOAT7    | AL122020.1 | APOL3      | ZBTB45     | NYAP1      | INTS1       | CHST11     | CLIP3      | WDFY1      | APH1B      | MAP3K8      | CEBPB      | CD37       |
| ALDOA       | TNFRSF19   | SETP14     | HIC1       | GRP78     | EV15L     | ANKRD1     | PTPRD-AS1  | HOCA-AS2   | TMEM120B   | PSAT1       | RPS18      | COTN8      | MARC1      | DCTPP1     | LTGP2       | MAP4K3-DT  | TMEM148    |
| SHOX2       | MAP701     | DOCK10     | SPPRED3    | PSMA1     | MPPED2    | EPN1       | NPIPA5     | SGCA       | PDCD11G2   | WDR24       | TPB18      | OTOF       | AC004156.1 | NEK11      | SBB5        | HCK        | CRYL1      |
| MAB21L2     | PTPRF      | DCLK2      | NRXN3      | ANOS2     | OSR2      | RPL5P34    | COL9A2     | MRPL15     | DOP1B      | EMC6        | AC025164.1 | NDFU81     | FAM160A1   | RAC2       | ETV5        | PCDH19     | H5G5T1     |
| MT-TY       | SCRGI      | AC006970.2 | MHYH13     | ANOS5     | FADD      | FBR5L1     | NCOR2      | RPS15A     | ARHGDA1    | ANKRD13A    | TNNT3      | LYPD6      | ZNF664     | LST1       | TSC22D4     | RAB9A      | DKK2       |
| ZNF703      | SOX11      | TPM1       | FAM243B    | NFIB      | ZBTB18    | SH3BP1     | C4orf48    | INHBA      | SMIM7      | PIGC        | PPP1R18    | TTYH3      | HNRNP3AP6  | TPSAN18    | CTBP1       | HDAC10     | CHCHD1     |
| AC027309.2  | ALDH1B1    | RPS3AP26   | TAMP8      | SOC52-AS1 | FOXCUT    | RPS23P8    | FLI1       | ZNF579     | FZD8       | CDC42EP3    | EPH8       | CELSR1     | LINC01684  | PIGB051    | GAD7D3B     | TRMT61B    | TLR2       |
| RPL18AP3    | GNCS       | SALL1      | EEF1A1P19  | ENPP2     | PCED1B    | CCNJL      | AL161909.1 | SAMD5      | MYPPO      | MARK4       | TRABD      | MFSD14A    | OClAD1     | PTGER1     | EMX2        | F10        | MAIP1      |
| FKBP1C      | ZBTB7A     | LINC00900  | DPH5       | MAZ       | CD84      | PRAG1      | BDNF       | P3H4       | CCSAP      | HEV2        | LYN        | MINK1      | ALDH2      | NF2        | POU2F2      | CD14       | TMEM201    |
| RAB51F      | PCBP1      | GALM       | ZMYND15    | RPS12     | NR2F1-AS1 | TRIM67     | EEF1A1P6   | AC099066.2 | AC093890.1 | S10P5       | MSX2       | AC04619.3  | FOXC2      | AC099560.2 | AR5J        | AP152      | SF3A1      |
| NR2F1       | MTCO2P12   | RPS11P5    | ARHGAP1    | RPL15P3   | ZNF385D   | MTCL1      | FRMD5      | LTBP3      | HSP90B2P   | SH3RF2      | PHLDB1     | TENM3-AS1  | ARL14EP    | GSK3A      | CDK17       | CDH15      | SLOC2B1    |
| AC016739.1  | ADH5       | RPL2P4     | PARP9      | STON2     | TNS1      | SGCG       | CYP19A1    | HOXA5      | ENGASE     | SLC44A3-AS1 | TMEM258    | CXCL16     | MYL6P5     | AL159918.1 | TMED1       | ITGAM      | C15orf54   |
| TFAP2A      | MET        | NACA       | FAM189B    | SERPINE1  | MDH2      | HSP61      | MTCO1P40   | RPL31      | NCA21      | PPP2R3C     | SIRPB1     | DLX4       | NDNF       | ARHGAP23   | AP2A1       | SLC40A1    | C10A       |
| HOXB3       | PLPP4      | MYH9       | ZNF865     | STRA6     | MDIN      | TATDN3     | EN1        | XPNPEP2    | RPS2P46    | OGFR1L      | LINC01629  | ADAMTS12   | MARVELD2   | DTWD1      | SMDT1       | PLA2G4     | AK2A       |
| TMSB4XP4    | PAX9       | HOXB5      | ARRB1      | TLES      | PROS1     | COX6A1     | DCBLD1     | FURIN      | GSTA4      | SRRM1       | RPL21      | LYPD6      | FZD6       | HADHB      | DECR1       | CKAP2      | MAPK2      |
| NPMP127     | EHD2       | RPS3A      | ZNF628     | TMSB10P1  | LMO3      | PTPRE      | ADAMTS6    | RPS7       | HIKESHI    | SUMO2P1     | ATXN2      | CLDN23     | SNHG29     | PLEKHG6    | TMEM184B    | AC020916.1 |            |
| TP1P1       | PKR12      | SKAP2      | AC112523.1 | SELENOP   | INTX      | TNXB       | PAK4       | HIP1R      | OST4       | ACAT1       | GASK1B     | ANGPTL1    | IDNK       | SERP2      | WNT5B       | KIAA1522   |            |
| IGFBP11     | AKR1C2     | E1F252P4   | ZFPM1      | NTRK2     | PLSCR1    | PLTP       | LRFN3      | DCH51      | STGGAL2    | SCCPDH      | CITED4     | CBARP      | FRP3       | SYNGR1     | SS18L2      | IAH1       |            |
| LDHB        | IEBP       | PARP15     | PTMAP5     | CALR      | JTB       | FASN       | EPGN       | ZNF282     | RPLP0      | ECM2        | RAB3A      | DUSP6      | BAG6       | AC067852.2 | SCN9A       | GET4       |            |
| COL15A1     | EEF1A1P11  | CACNA2D3   | F0XMA1     | PXMT1     | ZC3H18    | RAB11B     | MMP24OS    | PPIR19B    | AC005912.1 | CLCN4       | LGALS3     | PCID2      | TEX41      | GUSB       | SARMC5A-AS1 | FN1        |            |
| MTCO1P12    | CDH2       | HSP90A2P   | LYPD1      | RPL3P4    | EMB       | HMOX1      | TBP1L      | RPL14P1    | ABCA13     | CE51        | CCDC85C    | DDAH1      | LAMTOR4    | SP11       | TPG51       | ZNF771     |            |
| RASGRP1     | AL590867.2 | PKMP1      | LXK1       | SNHG25    | EEF1A1P34 | TLNRD1     | POTEE      | PRDX3      | TMEM255A   | AC026721.1  | NCF4       | REXO1      | SIVA1      | TCEAL3     | ATP5F1E     | ABC89      |            |
| RPSA        | AC008038.1 | ALX1       | BRD4       | TUSC1     | EEF1A1P29 | MIB2       | SLC35E1    | AC079949.2 | STK17A     | AL450332.1  | CUTC       | TNLI1      | SIP1A      | FCER1G     | SNX27       | TFPI2      |            |
| IQCC-SCHIP1 | ATP13A2    | PTXK2      | MGMT       | BKDKT     | TAF4      | RPL7A      | HNRNPKP2   | ITGAE      | AC004086.1 | BAG3        | RPL10      | ATP5P0     | CAV2       | Z84468.2   | DOCK8       | MT-TS2     |            |
| RPS18P12    | FYN        | GASS5      | PPDF       | GSC       | KRT81     | EEF1A1P16  | MKX3D      | ANAPC4     | TNFRSF21   | HOXA4       | DHX9P1     | BICRA      | EEF1A1P25  | MLHP       | SPATA20P1   | MAOA       |            |
| PTMAP4      | RPLP0P6    | SLC9A7     | ADAM19     | SASH1     | CLEC14A   | CAVIN1     | CX3CL1     | FLRT3      | TRIP4      | AP001000.1  | KLIF4      | PTMAP9     | TMEM14C    | WF51       | TUBBP1      | TRIB1      |            |
| HOXB2       | ADGRD1     | RFLNB      | WDR61      | NKG6-1    | TOR3A     | SLC2A12    | G1A1P1     | ACTB       | AK1        | SNX9        | ERICH2     | NDFU86     | PMPCB      | CAPS       | PAPPA2      | C1QC       |            |
| APOL6       | PLPFR2     | MT-TL1     | AC026877.1 | SCAF1     | TNFAIP6   | TAFAS      | AC014622.5 | FBGR3L     | MER2       | TMEM131L    | FCGR3A     | OBSCN      | PNMA2      | ADAMTS9    | SIPAL13     | PSM6C      |            |
| MAB21L1     | AC009349.2 | PTPRD      | CLEC11A    | BCAR3     | GAPDH5P6  | LANCL3     | MPG        | MIR137HG   | TCEA1      | B4GLT3      | EEF1A1     | CA13       | KT112      | MEMO1      | AC14831.1   | AC009299.2 |            |
| FOXD1       | BMP8B      | TGFBI      | RPL7       | ATN1      | MGRN1     | LBH        | PERR1      | CH13L1     | DNAJB4     | SOCSF30     | GMD5       | AC018697.1 | LARS       | CA2        | AC245100.3  | SNHG15     |            |
| HAND2-AS1   | C11orf87   | GAPDH6P0   | RPL39      | MGAT2     | ZNF668    | RPL10P9    | RPS8       | CD274      | IER5L      | KNCNB1      | C1QB       | EGF        | TOMM5      | ENDOG      | KNCS3       | EMP1       |            |
| AKR1C1      | CNTNAP3B   | PRTFDC1    | HIVP63     | NUDT10    | SLC16A2   | SCN3A      | HSCB       | SCARF2     | F1F35      | ELAC1       | LRRRC47    | PRKCA      | TPN32G1    | FZD2       | MEPCE       | SCAF2      |            |
| AL135905.2  | PRTT       | AC004453.1 | COL4A4     | MIR9A9HG  | MORN2     | PPIAP22    | RPL29P11   | IRF2BP1    | ADGR2      | LKHL21      | PTPN6      | MORN2      | CNN2       | ACTBP2     | S100A9      | STRK34     |            |
| HAND2       | SNRPE      | MAGED4B    | OTUD5      | IL13R1    | ARC       | ITGA3      | UBALD2     | ZNF414     | F8XL19     | ANXA1       | GPR158     | TLR1       | P16        | AL691447.2 | AP3D1       | CASP4      |            |
| LDHA7       | AL059714.1 | PIPSK1L    | RPL34      | PTSM6     | ACTN1     | IT3GAL1    | AGAP2-AS1  | ZNF787     | MRP11      | STM16       | PADI2      | DNKAP1L    | SEM5A      | ARHGAP21   | NMRAL2P     |            |            |
| CRLS1       | HNRNCP2    | RSRC1      | XYLT2      | RPL23A    | GLCCI1    | PSMG2      | NACCI1     | AC078817.1 | MYH11      | TBX4        | RANP1      | CHERP      | E1F3E      | LAMA2      | OSER1-DT    | MCF2L      |            |
| TIMP4       | IVD        | EPPIK1     | RAB8A      | ERF       | DCDC1     | HOXB8      | NUDT3      | CHCHD2P2   | TRIA1P1    | GLDN        | AC113404.3 | LINC01138  | NLRP3      | COTL1      | R653        | DBNDD1     |            |
| EXTL1       | ABCA2      | HOXA3      | PCGF2      | CDC5C1    | SDHD      | AMIGO2     | MAGEL2     | LOC60      | PREX2      | QKTRP       | LRCH4      | MAPK1P1L   | HOXA2      | ANXA2P3    | PLA1A       | CASP1      |            |
| AF201337.1  | B3GALT2    | GMP1       | ANXA2P2    | ADARB1    | RPS29     | FAM222B    | LIMK1      | AC130371.2 | UBE2M      | MBOAT2      | PRELID2    | ATP1A2     | LV75       | PLCXD1     | C8orf76     | OLFM1      |            |
| SMURF2P1    | PIM3       | PIGF       | TOR4A      | RAVER1    | CAP1P2    | ECHDC1     | CARHSP1    | UBTD1      | LINC00595  | SABP3       | SPRYD7     | RPL13AP5   | MAP3K10    | C8orf33    | PCDD4       | ATF5       |            |

### MGUS vs MM Overlap

|            |            |           |            |           |            |            |            |           |             |             |            |
|------------|------------|-----------|------------|-----------|------------|------------|------------|-----------|-------------|-------------|------------|
| HOXB7      | AC093849.2 | COL4A4    | ARC        | MMP20X5   | RFX5       | METTL26    | C1TNB81    | LINC02217 | ADAMT59     | FER1L4      | AC116533.1 |
| HOXB4      | BMP8B      | RPL34     | DCDC1      | CSF1R     | TMEM100    | KNCN81     | OTOF       | SLC22A17  | LAL3B1      | PAPPA2      | CASP1      |
| SHOX2      | C11orf87   | KYNU      | RPS29      | ME3D3     | AC004201.4 | CEP152     | NDUF81     | TNXCDD1   | CA2         | AC24500.3   | AL69420.1  |
| HOXB21L2   | CNTNAP3B   | PCGF2     | GTM46B     | CXCR4     | STMY2      | SLC4A2     | ELL        | LAMTOR4   | LHFPL6      | FAM241B     | ARHGAP4    |
| MT-TY      | PR67       | SOC52     | HSD17      | GFYF98    | ISM1       | OPN5       | IRW6       | OSGEP     | KCNK3       | 5GDP5P      | SCGB3A2    |
| ZNF703     | IVD        | PCAT6     | INDUP411   | RPS8      | OHFLM2A    | GLDN       | LYPD6      | SIPA1     | FILP1L      | BLOC155     | SHROOM2    |
| NFRF1      | B3GALT2    | PSMA1     | ENTPD8     | HSC6B     | ARHGDA1    | MGARP      | PARP14     | SLC2A12   | CERN1       | VSTM2L      | CLCA2      |
| TFAP2A     | RPSO3      | ANOS      | AQP1       | INSC      | FZD8       | IL7B       | NRN1       | WRDS3     | PGK1        | LRP10       | D3CHAV1L1  |
| HOXB3      | PIM3       | SOC52-AS1 | UBALD2     | MWOP      | NDL2       | MFS014A    | PANMA2     | NOTCH1    | P2RY6       | OZFMI1      |            |
| SLC24A3    | TBX15      | ENPP2     | AL122020.1 | CDC42EP5  | AC093890.1 | UNG        | PXDC1      | ZFPA2     | AL691447.2  | ARHGAP27    | POLR2J3    |
| TMSB4XP4   | DCLK2      | MAZ       | ANKRD1     | MAGEL2    | LINC00654  | ABCD1      | D0X6G      | LARS      | FBLM1       | STBD1       | MT-TC      |
| IGFBP11    | SALL1      | RPS12     | RPL5P4     | UKM1      | RPS21      | RPS18      | TPSAN15    | PIIRA     | LAMA2       | ARHGAP21    | CDC7C      |
| COL5A1     | LINC09000  | STK23A    | SH3BP1     | CAHSP1    | CHMP1B3P   | TB18       | CXCL16     | P16       | TRND        | MIR210      | DTX3L      |
| RASGEF1    | NACA       | STRAG     | PRAG1      | NUDT11    | ABCA13     | ADAMT55    | BST1       | ADY10P1   | AF3         | PCOD4       | TMEM148    |
| AC02034.1  | HOXB5      | TLES      | TRIM67     | GYPE      | TMEM255A   | AC025164.1 | CIQTNF1    | NLRP3     | TNXCDS      | PTMS        | SAT2       |
| HOXB2      | CACNA2D3   | SELENOP   | MOK        | HOXA-52   | STK17A     | STYK1      | KCN41      | HOXA2     | MARX3C      | ZNF518B     | PCDH18     |
| APOL6      | ALX1       | NTRK2     | HSP61      | SGCA      | AC004086.1 | TRABD      | ZNF170     | L7Y5      | SPL2ZA      | WWC1        | NTF3       |
| MAB21L1    | PTXZ       | ASP       | CXO6A1     | NEM6      | FAM87A     | P2RX5      | SLC12A8    | DTX4      | USF2        | CEBPA       | H5G5T1     |
| HAND2-AS1  | RFLNB      | MIPEP     | PTPRE      | RPS15A    | TCEA1      | CDKN2A     | ATP5P0     | RNASE2    | TSC22D4     | LTCA5       | CHCHD1     |
| HAND2      | MT-TL1     | RPL3P4    | TNXB       | ZNF579    | PADI1      | LYN        | CA13       | CANX      | CTBP1       | HDAC10      | KRT17      |
| TLR5       | PTPRD      | SNHG25    | RAB11B     | BAIAP211  | RLTB       | TPSAN13    | AC018697.1 | ALKRH2    | TRMT61B     | SF3A1       |            |
| CADM1      | TGFBI      | CPE       | MIB2       | HOMAS     | MHL1       | SHSAL1     | SLC25A1    | POLD4     | EMK2        | TTC12A      |            |
| TIMP4      | PDE3A      | SASH1     | RPL7A      | RPL31     | PREX2      | MK2        | TRIR       | PCDH6B    | NKX2        | F10         |            |
| EXTL1      | PRFDC1     | NKG6-1    | SLC2A12    | XPMPPE2   | RPS13      | TMEM258    | DCLK1      | APH1B     | FOXF2       | RPS19       |            |
| AF201337.1 | AC004453.1 | NUDT10    | LBH        | RPS7      | PSAT1      | LINC01629  | CHERP      | ZNF408    | POU2F1      | SLC40A1     |            |
| HOXB6      | RSRC1      | IL18R1    | SCN3A      | HIP1R     | CLIC3      | TMEM204    | RASGEF3    | PAC2      | GATA6-AS1   | PLA2G2A     |            |
| MOCOS      | HOXA3      | RPL23A    | PSMG2      | DCH51     | EMT14      | ATP1A2     | P1GB051    | FCGR2B    | F3          |             |            |
| TNFRSF19   | RASSF7     | ADARB1    | HOXB8      | PCSK1N    | ERAP1      | TSP1       | AP006965.2 | PTGER1    | SHISA4      | AC011352.3  |            |
| SMOC2      | GMP1       | RAVER1    | SEMA3D     | RPL14P1   | MARK4      | PCDH9      | CFR6       | D3EAP     | CD320       |             |            |
| FOX2P      | PIGF       | HTRA3     | FAS1       | PLAG2A    | TPSAN11    | AMZ1       | PAPPA      | DX3       | AP2A1       | COMM4D      |            |
| SOX11      | ELN        | MPPED2    | TMEM158    | FLRT3     | HEY2       | AP006995.1 | AC004156.1 | SLC20A2   | SMDT1       | NRL3        |            |
| ALDH1B1    | ALDH3A2    | OSR2      | NRP2       | ACE2      | BGN        | KLF4       | TM2        | TK2       | C9orf46     | EGF7        |            |
| SCARAS     | NRXN3      | CDKN2B    | TFE8       | ACTB      | CRIM1      | AL519345.1 | FAM160A1   | STR3A1    | TMEM184B    | ZNF771      |            |
| STEAP4     | MHYH13     | FOXCUT    | C4orf48    | P2RX1     | ECM2       | HSPB1      | ZNF664     | TUB       | PIK3R1      | SLC22D1-AS1 |            |
| MTCO2P12   | ZMYND15    | PCED1B    | ASPA       | MZT2A     | GBG1       | AC004601.1 | S5BP3      | MCLP2     | WNT5B       | TFPI2       |            |
| RPLP4      | PARP9      | NR2F1-AS1 | BONF       | MIR137HG  | CLN4       | PTPN6      | NDUF9A     | F1L1      | S5182       | MT-TS2      |            |
| IL13RA2    | KHLH13     | ZNF85D    | SMO2       | CH13L1    | AC026271.1 | GRP158     | LINC01684  | SIN3A     | ETV6        | MAOA        |            |
| PAX9       | LYPD1      | PROS1     | CYP19A1    | IRF2BP1   | AL450332.1 | PADI2      | PITPN1     | RNYS4     | SMARCA5-AS1 | TR181       |            |
| PRR12      | FBN2       | LMO3      | ANKRD37    | ZNF414    | AC012462.1 | C1orf162   | COR3A1     | WDR21     | TPG12       | SBD1        |            |
| BRP        | MGMT       | DNMT1     | EN1        | ZNF787    | HOXA4      | AC113043.3 | PDE1A1     | TMUB1     | ZNF321      | CB2         |            |
| HR43       | PROPF      | JTB       | RFLNA      | LINC01298 | SOX6       | CHEK2      | TCEAL3     | ATP5F1E   | ENP1        |             |            |
| FYN        | CLEC11A    | KRT81     | ARHGDB1    | AC130712  | NOVA1      | HDX181     | NDNF       | Z84682.2  | CAP1        | SPRY3       |            |
| TMTC1      | SLC9A9     | CLEC14A   | ADAMT56    | UBALD2    | SNX9       | PTGER4     | MARVELD2   | SENR      | BCL9L       | LINC020     |            |
| ADGRD1     | CD47       | TNFAIP6   | EPGN       | PGDFG     | FN3K       | CLIP3      | CLDN14     | GBP1P1    | SPATA20P1   | MCF2L       |            |

### SMM vs MM Overlap

|       |       |       |       |           |            |       |        |         |       |       |           |       |
|-------|-------|-------|-------|-----------|------------|-------|--------|---------|-------|-------|-----------|-------|
| HOXB7 | KCNK5 | WNT5B | HCLL1 | LINC01629 | UCHL3      | NTRK  | RPL5P4 | CCD4B   | RAB32 | DGAP1 | PRDM16-DT | MROH1 |
| RAP2B | ENC1  | PTD3  | RGS16 | ITGA9     | NKXAP5-AS2 | MAP3K | BAIAP2 | TNFRSF2 |       |       |           |       |



# Suppl. Figure 3

**A**

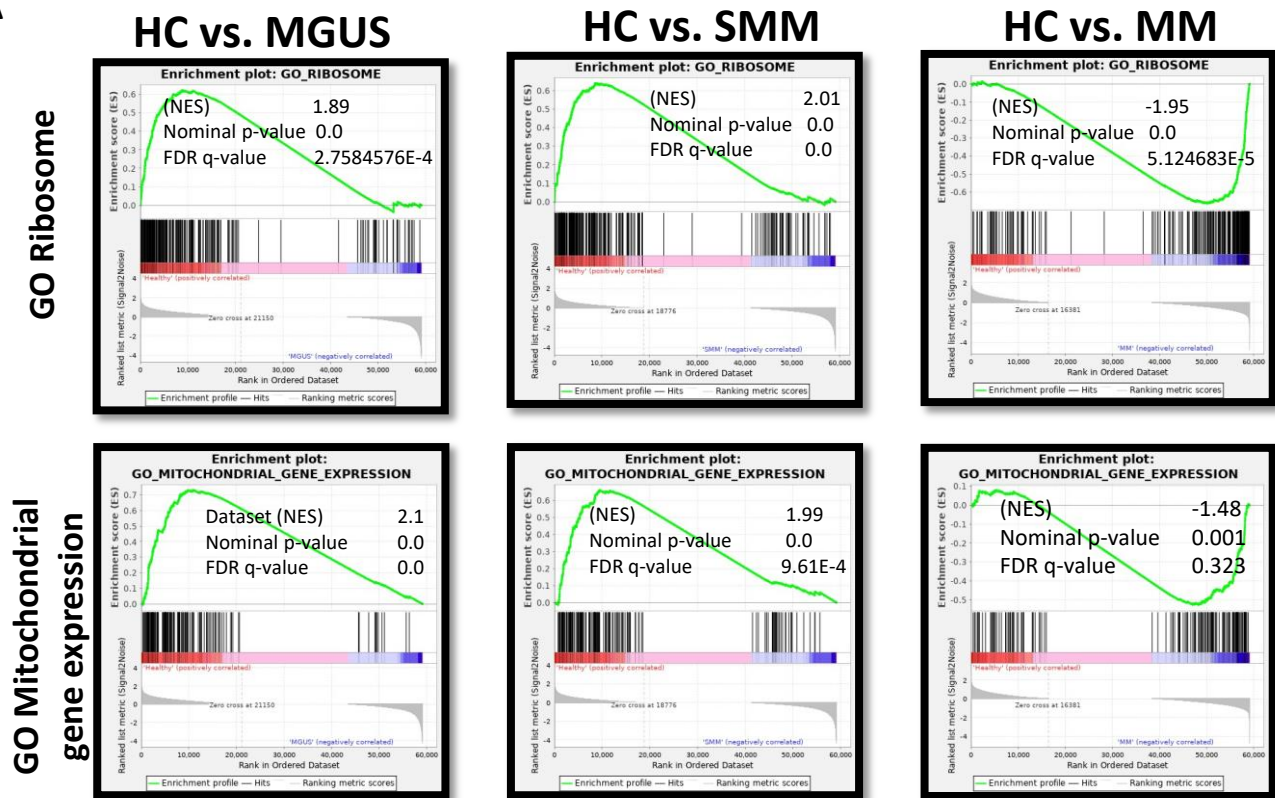

**B**

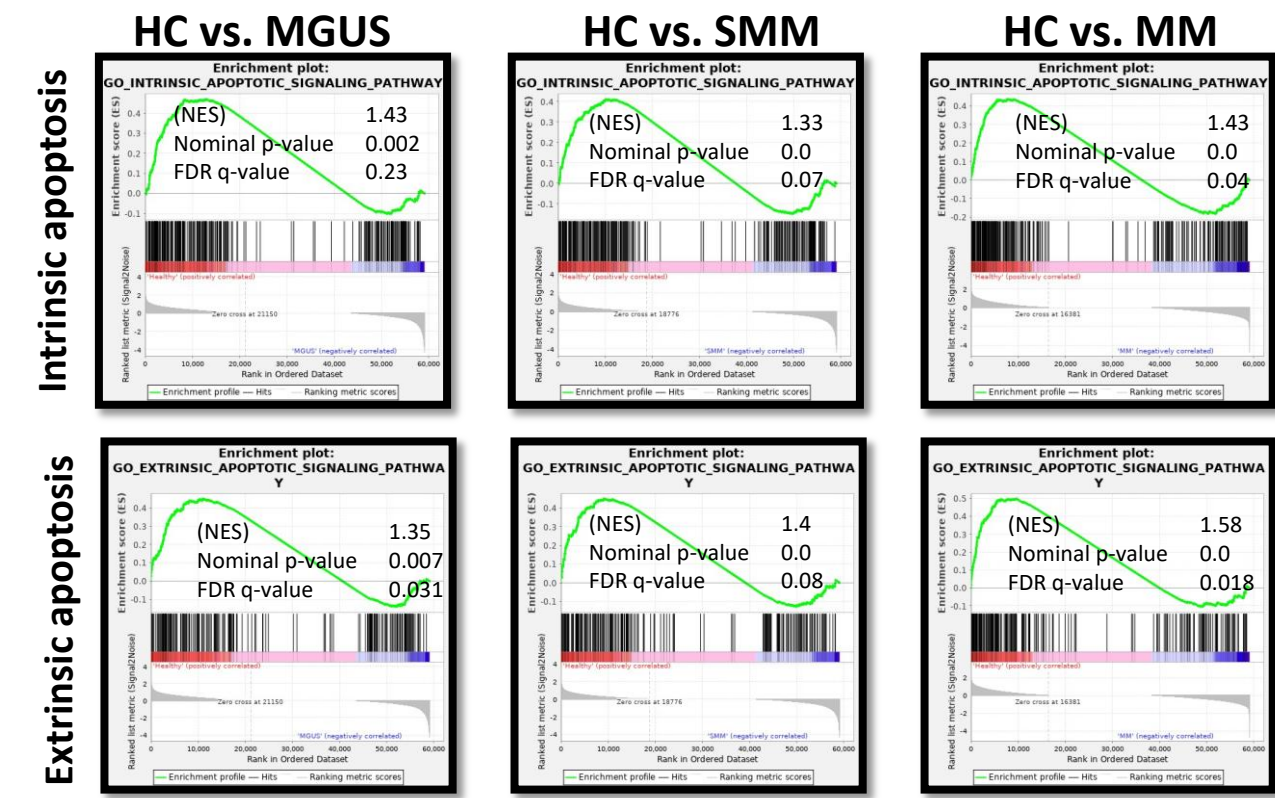

Supplement: BLOODA_ADV-2023-011632-mmc2.pdf [file BLOODA_ADV-2023-011632-mmc2.pdf]
